# Supplementary material for: A ratiometric fluorescent probe for real-time monitoring of intracellular glutathione fluctuations in response to cisplatin
Source: PubMed Central journal article supplement — Chem Sci. 2020 Jul 29;11(32):8495–501. doi: 10.1039/d0sc02889d (PMC8163343; doi:10.1039/d0sc02889d), 2020-07-29
Supplement: SC-011-D0SC02889D-s001.pdf [file SC-011-D0SC02889D-s001.pdf]

# **A ratiometric fluorescent probe for real-time monitoring of intracellular glutathione fluctuations in response to cisplatin**

Hanzhuang Liu<sup>#</sup>, Wenting Song<sup>#</sup>, Shuren Zhang,  
Kin Shing Chan, Zijian Guo<sup>\*</sup> and Zhen Shen<sup>\*</sup>

[zguo@nju.edu.cn](mailto:zguo@nju.edu.cn)

[zshen@nju.edu.cn](mailto:zshen@nju.edu.cn)

State Key Laboratory of Coordination Chemistry, School of Chemistry and  
Chemical Engineering, Nanjing University, Nanjing, 210046, China.

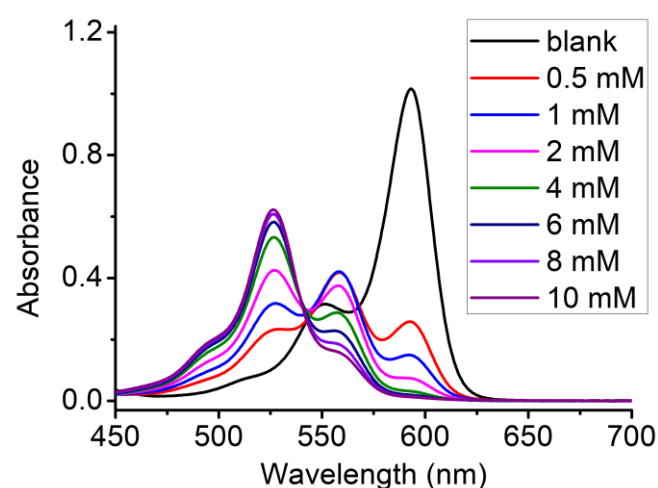

**Fig. S1.** Absorption spectra of **1** (10  $\mu$ M) upon gradual addition of GSH (0-10 mM) in 0.2M PBS (30% ethanol). The excitation wavelength is 514nm. Each spectrum was recorded 15 minutes after GSH addition.

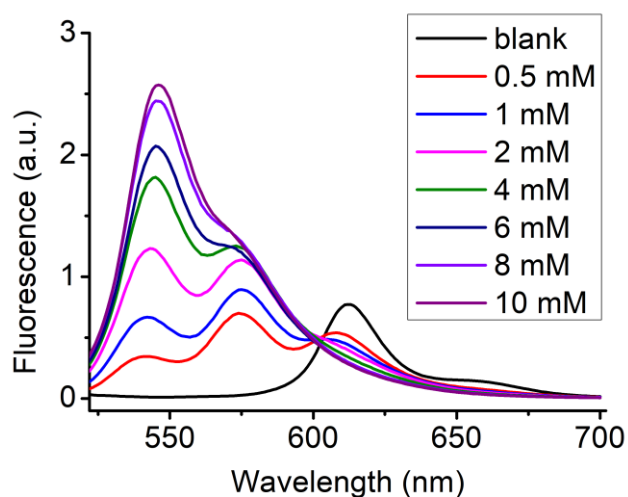

**Fig. S2.** Fluorescence spectra of **1** (10  $\mu$ M) upon gradual addition of GSH (0-10 mM) in 0.2M PBS (30% ethanol). The excitation wavelength is 514nm. Each spectrum was recorded 15 minutes after GSH addition.

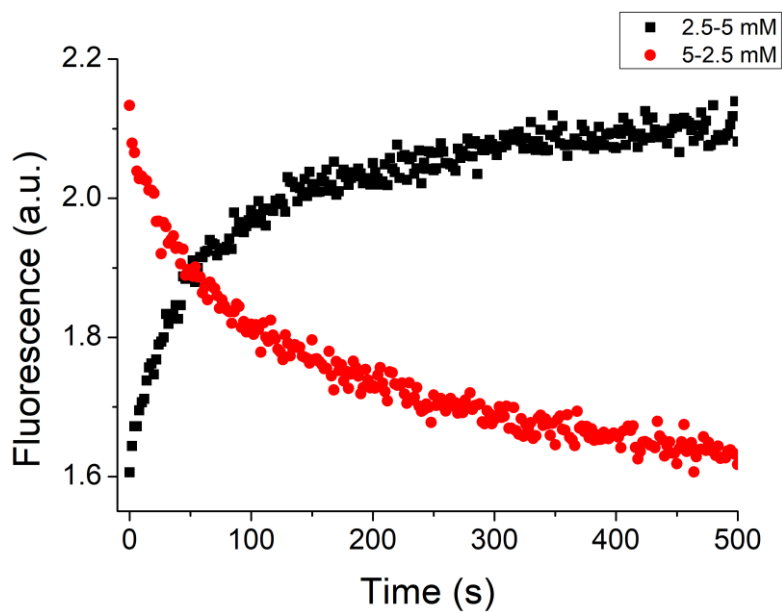

**Fig. S3.** Time-course fluorescence response spectra of **1** (10  $\mu$ M) towards GSH concentration (2.5 mM -5 mM) both in forward and reverse reactions in 0.2 M PBS (30% ethanol) at 37  $^{\circ}$ C.  $\lambda_{\text{ex}}$  = 488 nm,  $\lambda_{\text{em}}$  = 544 nm. GSH was depleted by adding N-Ethylmaleimide (NEM).

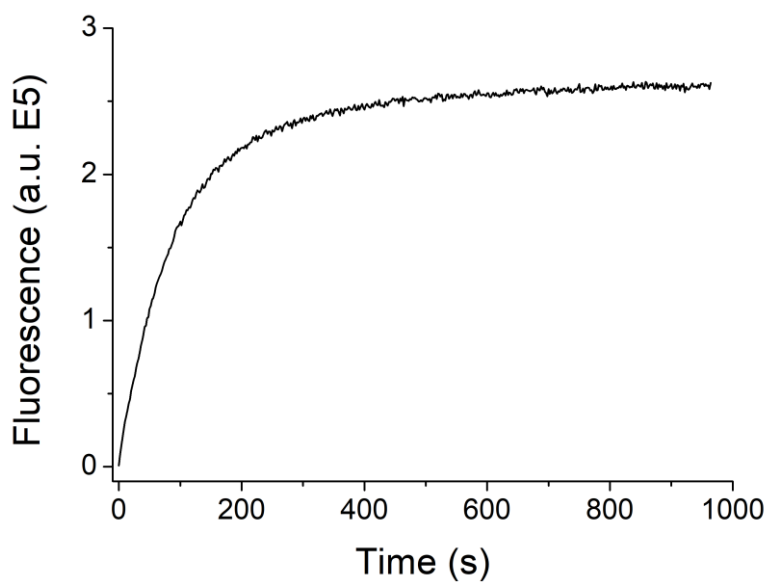

**Fig. S4.** Time-course fluorescence response spectra of **1** (10  $\mu$ M) towards GSH (10 mM) in 0.2 M PBS (30% ethanol).  $\lambda_{\text{ex}}$  = 488 nm,  $\lambda_{\text{em}}$  = 544 nm.

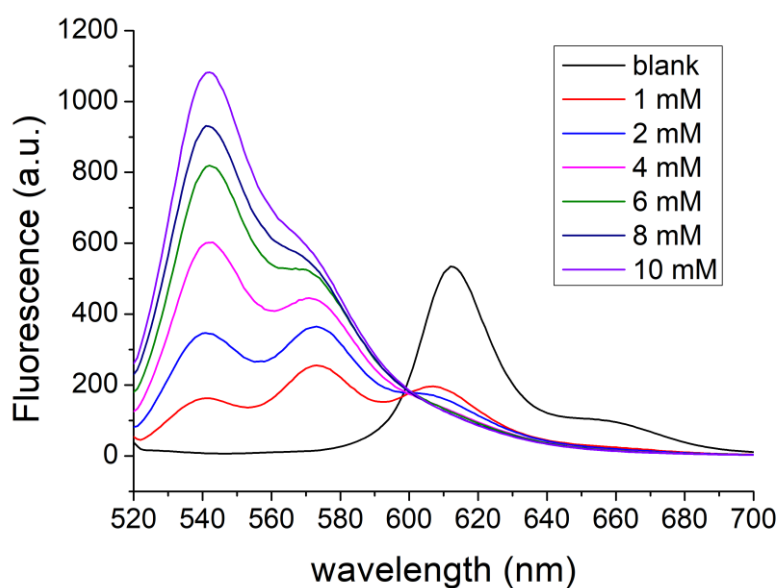

**Fig. S5.** Fluorescence spectra of **1** (10  $\mu$ M) upon gradual addition of cysteine (0-10 mM) in 0.2 M PBS (30% ethanol). The excitation wavelength is 514 nm. Each spectrum was recorded 15 minutes after cysteine addition.

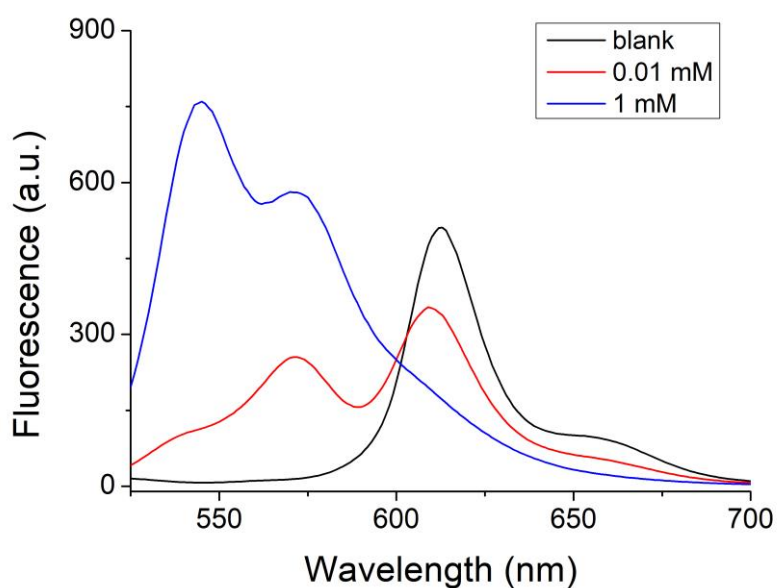

**Fig. S6.** Fluorescence spectra of **1** (10  $\mu$ M) upon gradual addition of homocysteine 0.1-1 mM in 0.2 M PBSd (30% ethanol). The excitation wavelength is 514 nm. Each spectrum was recorded 15 minutes after homocysteine addition.

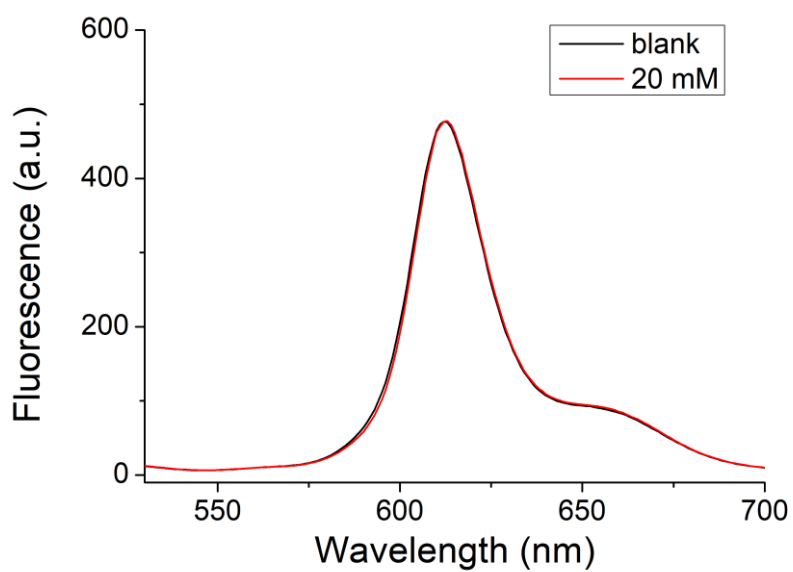

**Fig. S7.** Fluorescence spectra of **1** (10  $\mu$ M) upon gradual addition of taurine 20 mM in 0.2 M PBS (30% ethanol). The excitation wavelength is 514 nm. Each spectrum was recorded 15 minutes after homocysteine addition.

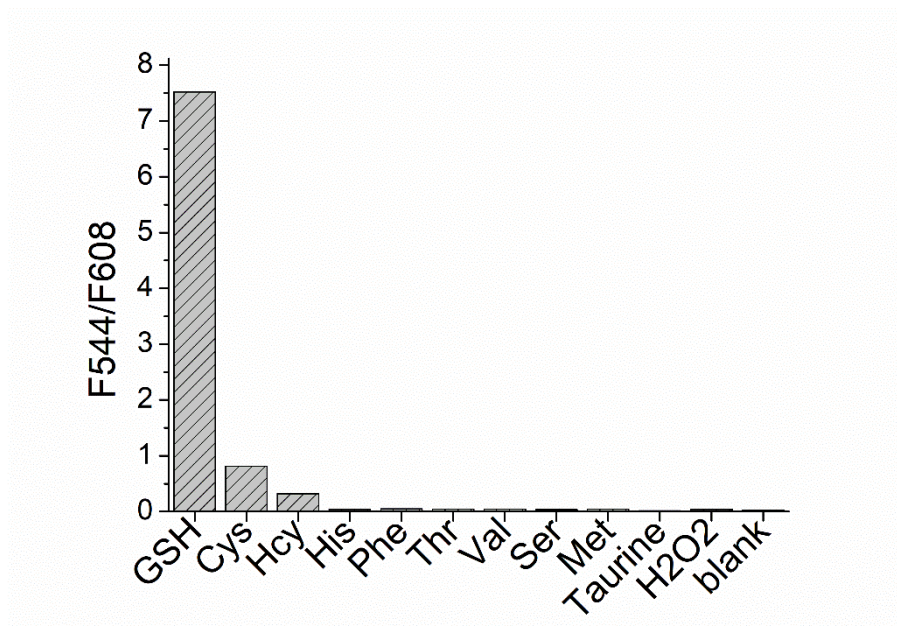

**Fig. S8.** Fluorescence ratio of **1** after equilibrated with various of physiologically relevant species.

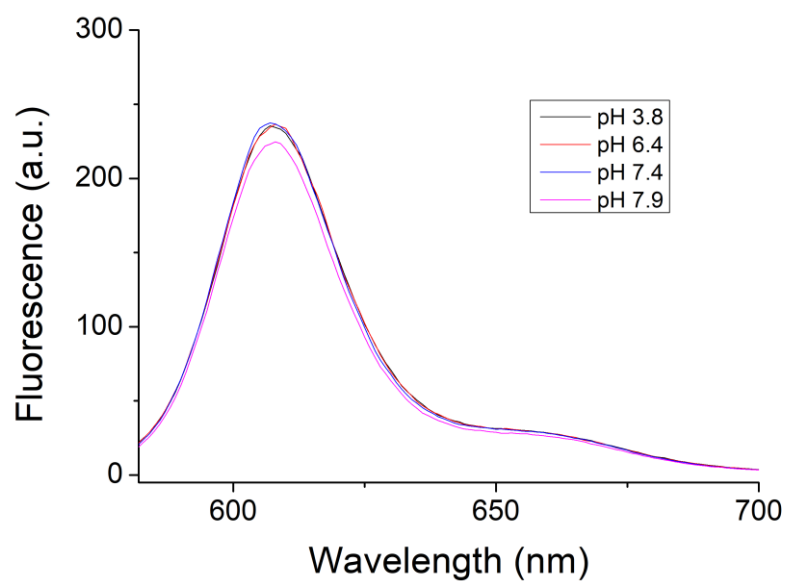

**Fig. S9.** Fluorescence spectra of **1** (10  $\mu$ M) in different pH in 30% ethanol solution. The excitation wavelength is 514 nm. Each spectrum was recorded 15 minutes after pH adjustment.

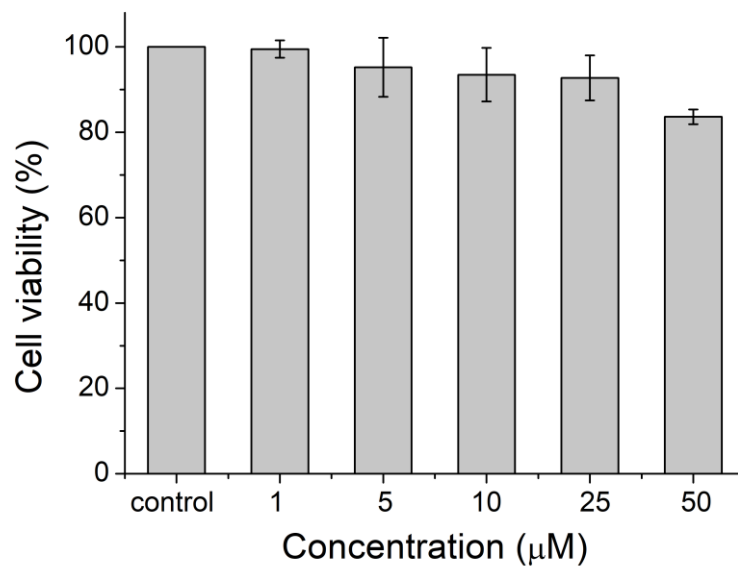

**Fig. S10.** Cell viability after 24 hours incubated with different concentration of **1**.

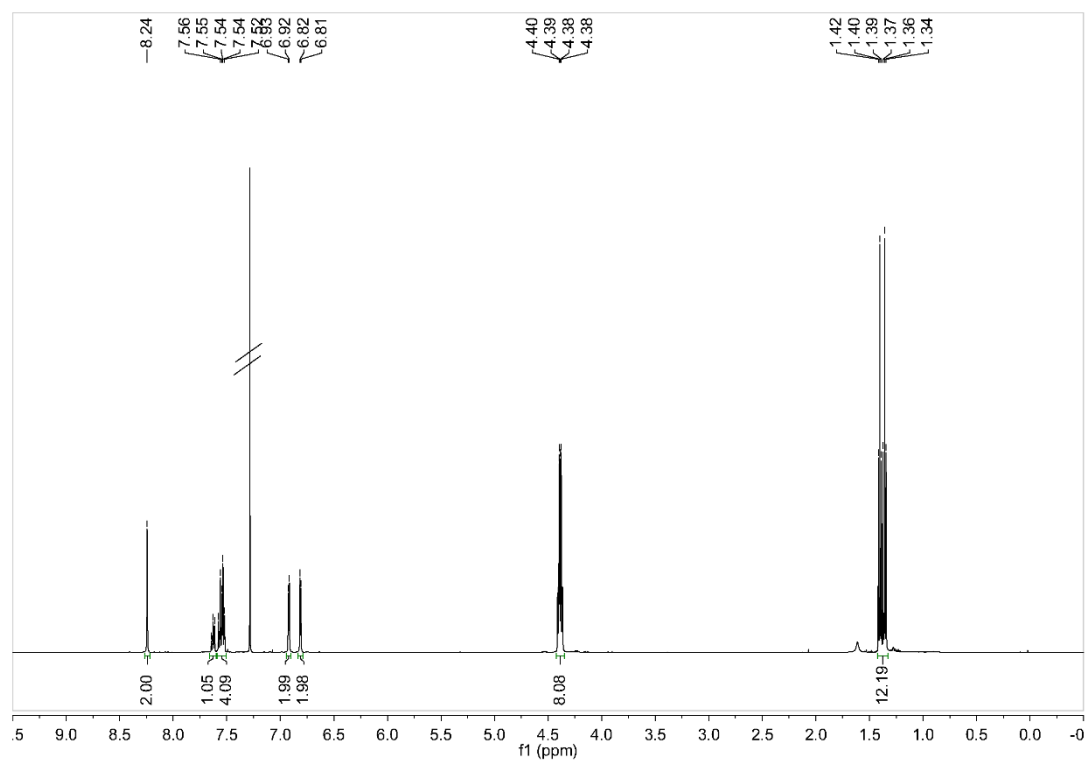

**Fig. S11.**  $^1\text{H}$  NMR of **1**

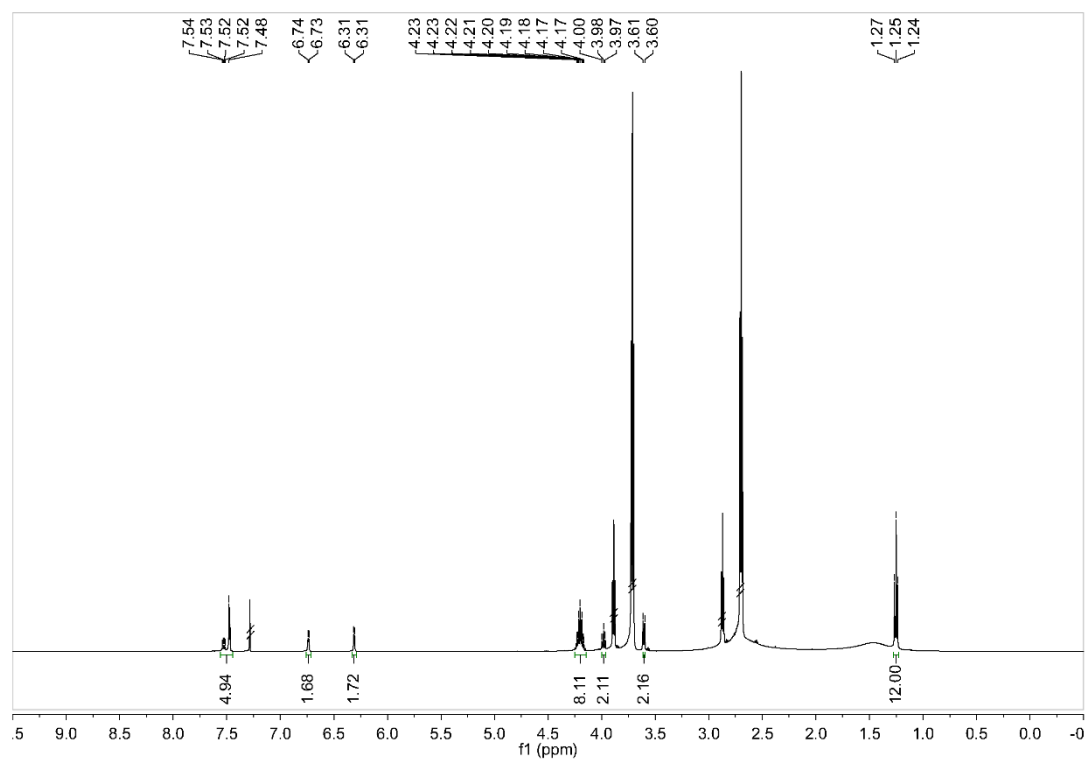

**Fig. S12.**  $^1\text{H}$  NMR of **1+2-mercaptoethanol**.

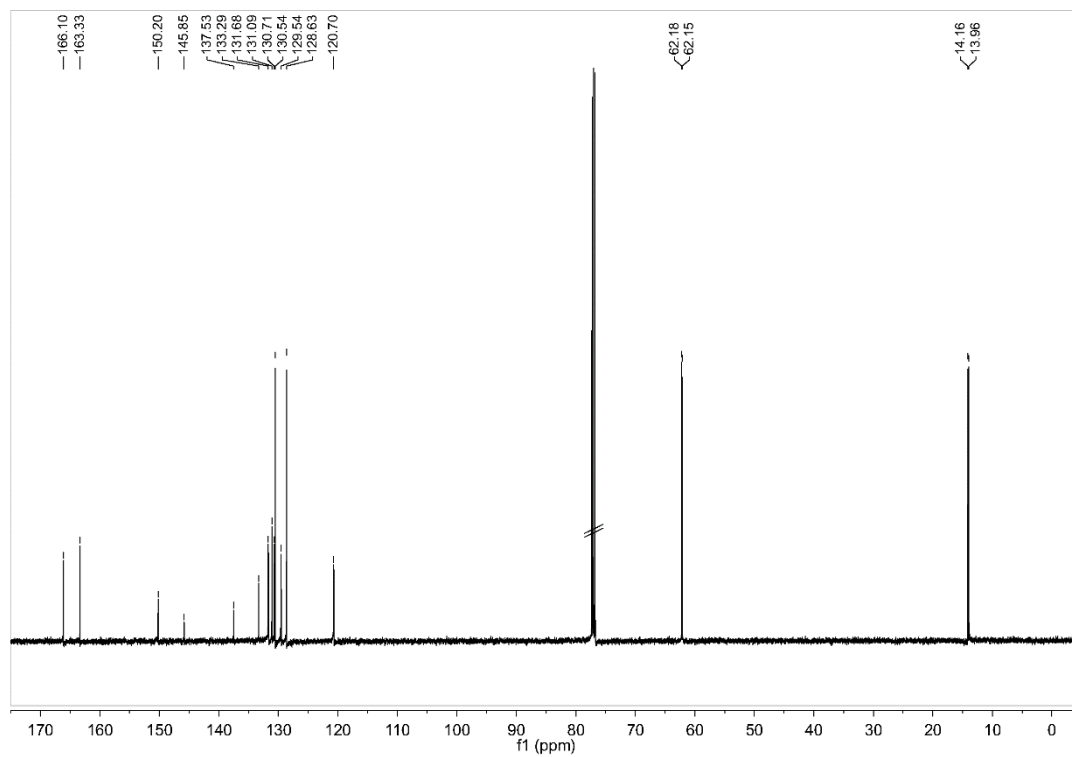

**Fig. S13.**  $^{13}\text{C}$  NMR of **1**

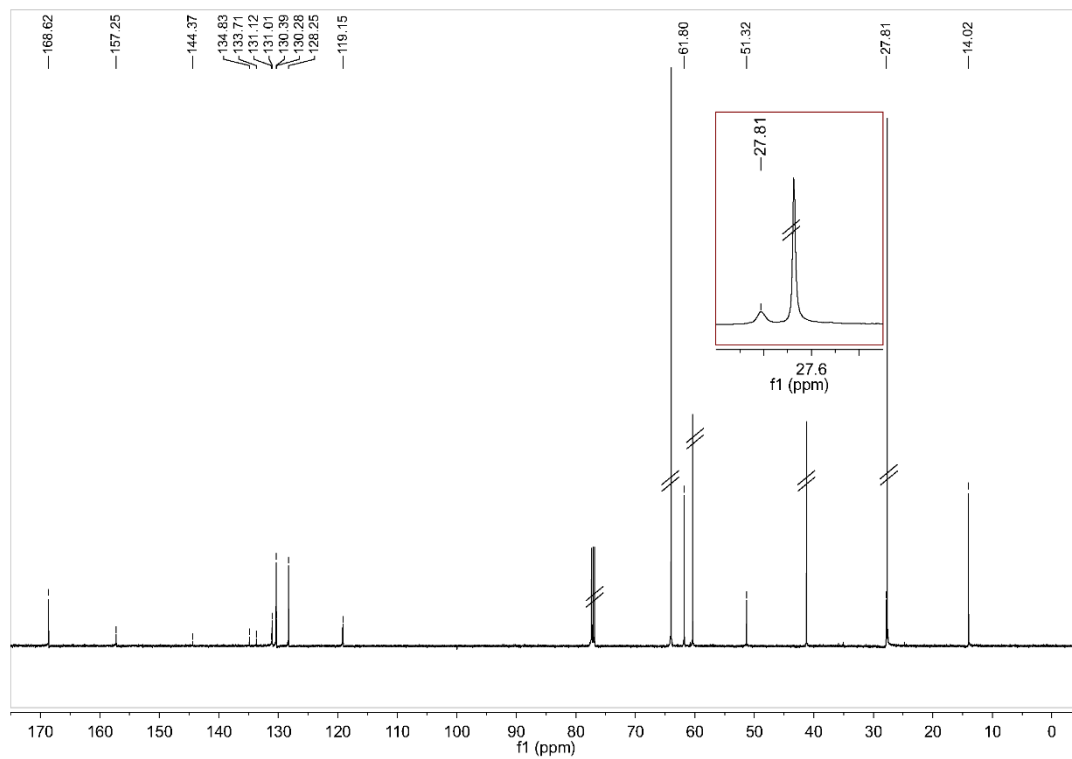

**Fig. S14.**  $^{13}\text{C}$  NMR of **1**+2-mercaptoethanol.

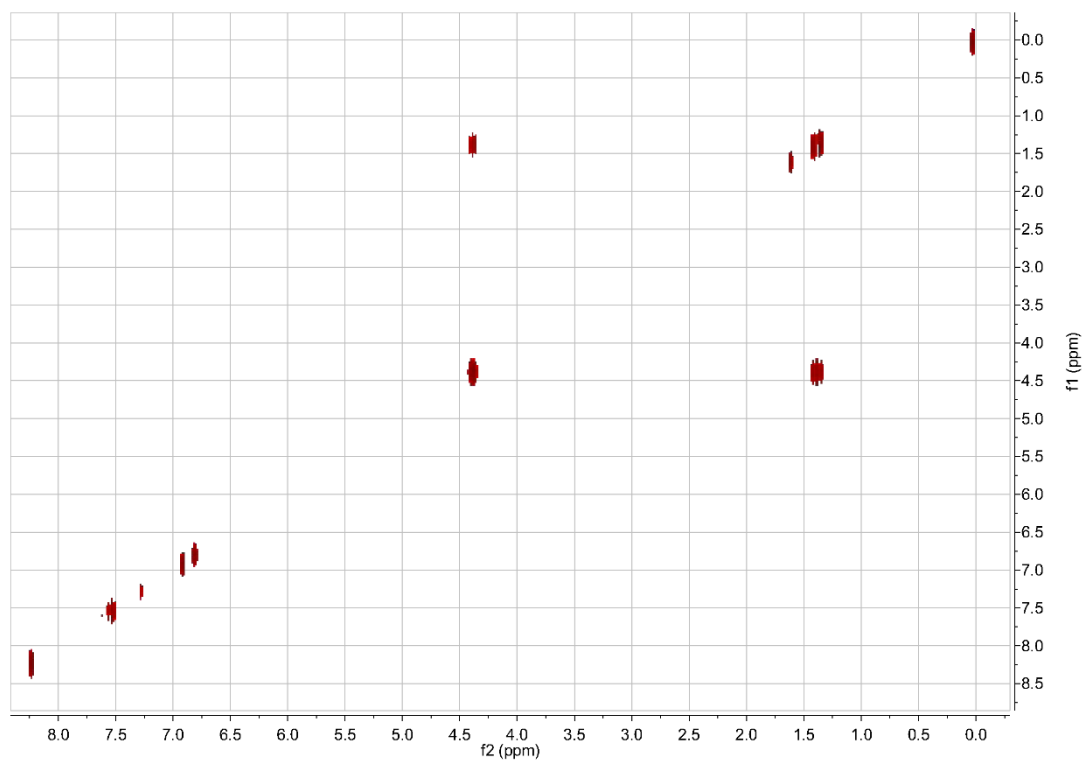

**Fig. S15.** H-H COSY of NMR of **1**

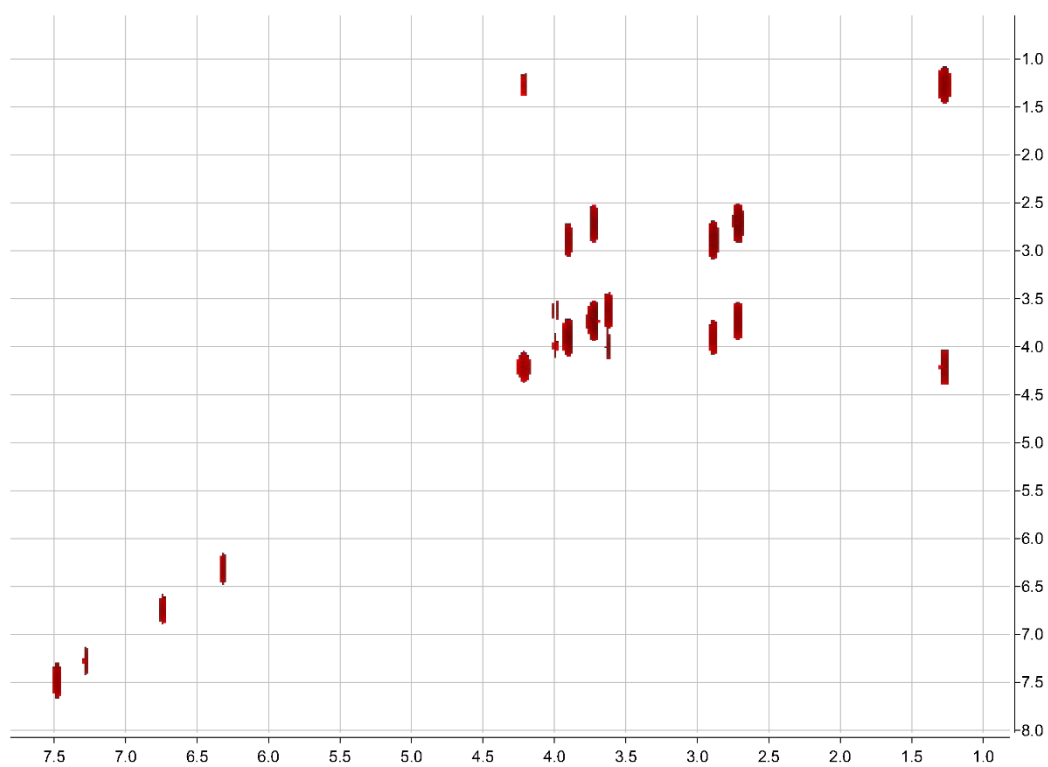

**Fig. S16.** H-H COSY of NMR of **1**+2-mercaptoethanol.

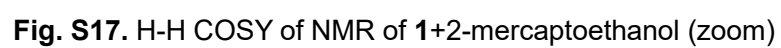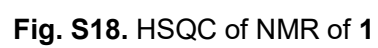

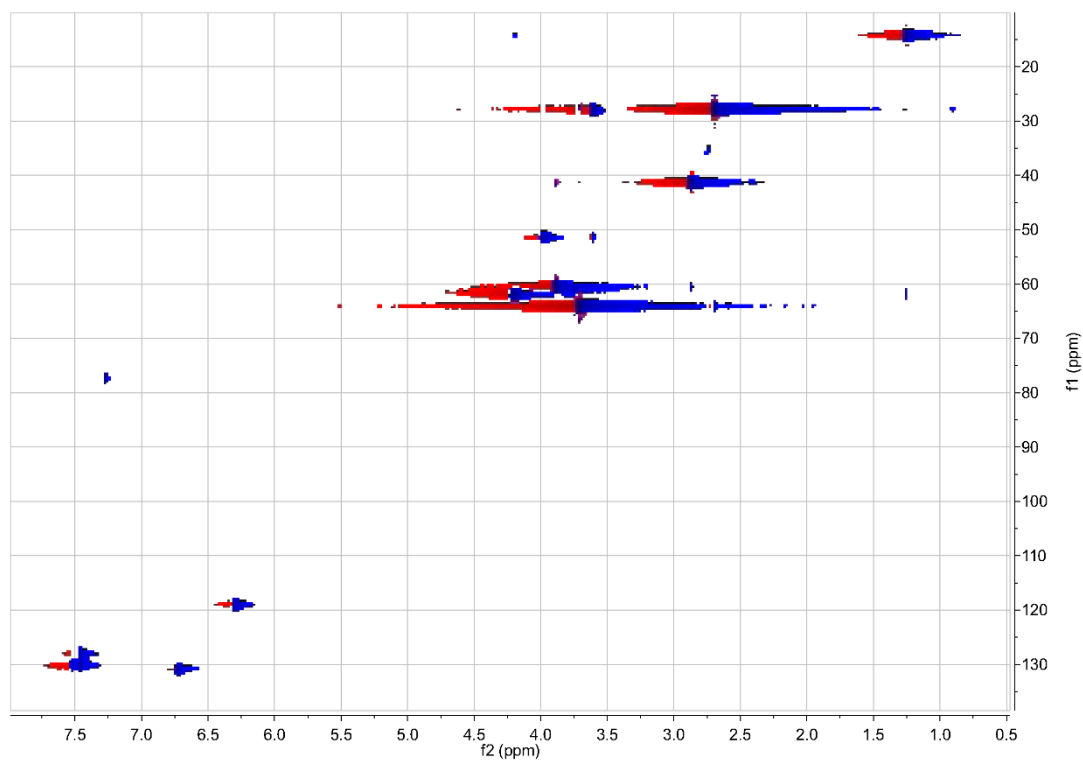

**Fig. S19.** HSQC of NMR of 1+2-mercaptoethanol.

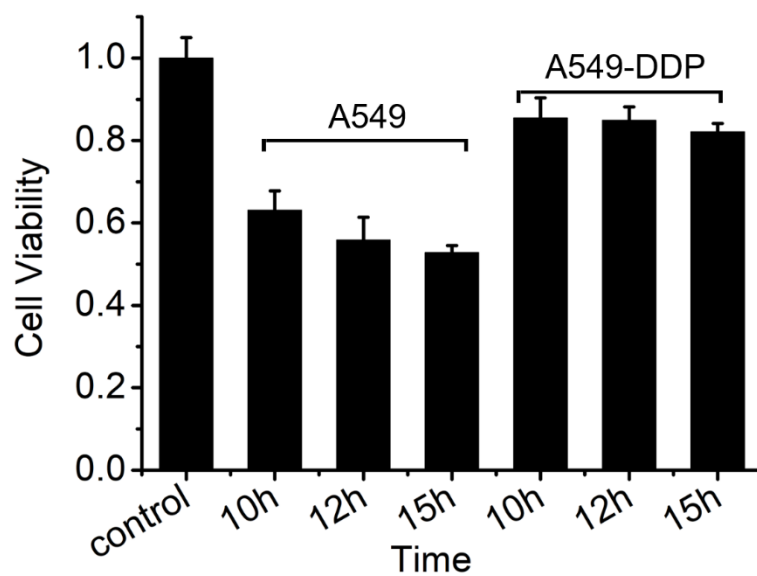

**Fig. S20.** Cell viability in A549 and A549-DDP cells upon treatment with cisplatin (20  $\mu$ M) at different time in the same culture conditions as the confocal experiments. Data are expressed as mean (%)  $\pm$  standard deviation (S.D.) of at least three independent assays.

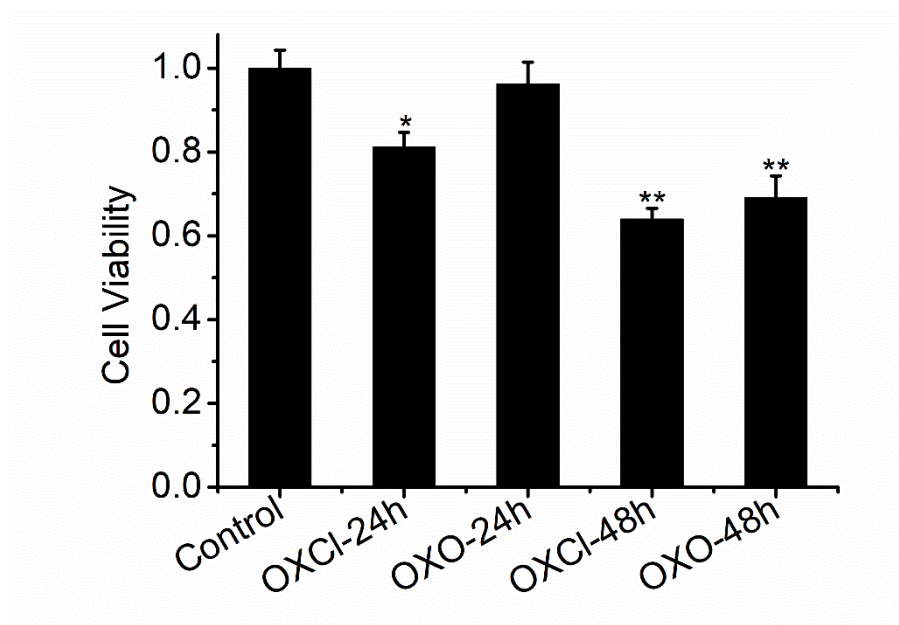

**Fig. S21.** Cell viability in A549 cells upon oxoplatin and oxclplatin (10  $\mu$ M) treatment at different time. Data are expressed as mean(%) $\pm$ standard deviation(S.D.) of at least three independent assays. \*, $p < 0.05$ ; \*\*, $p < 0.01$

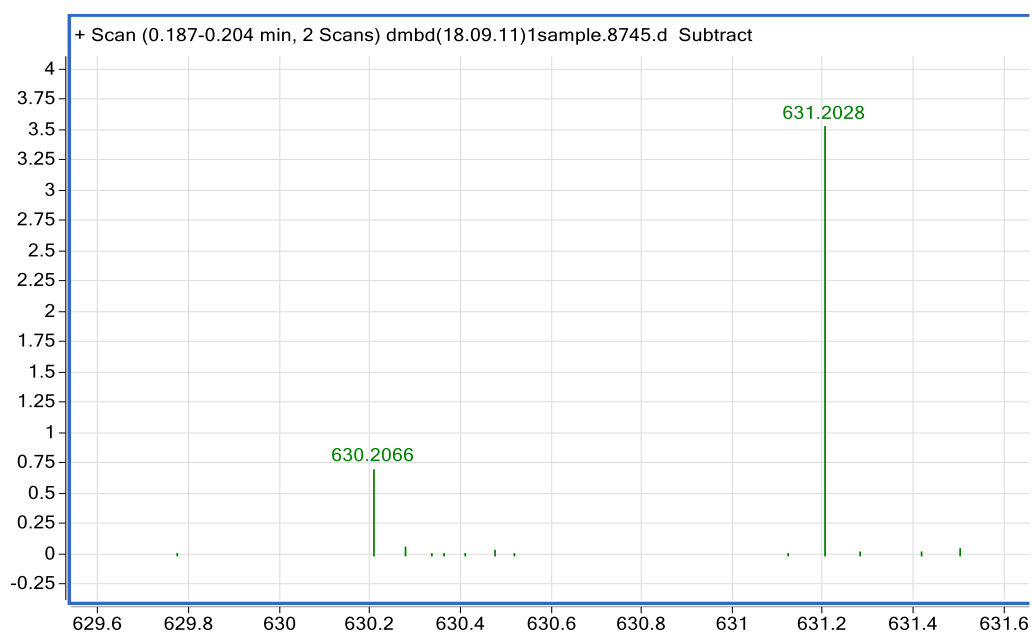

**Fig. S22.** HRMS of  $[1+Na]^+$

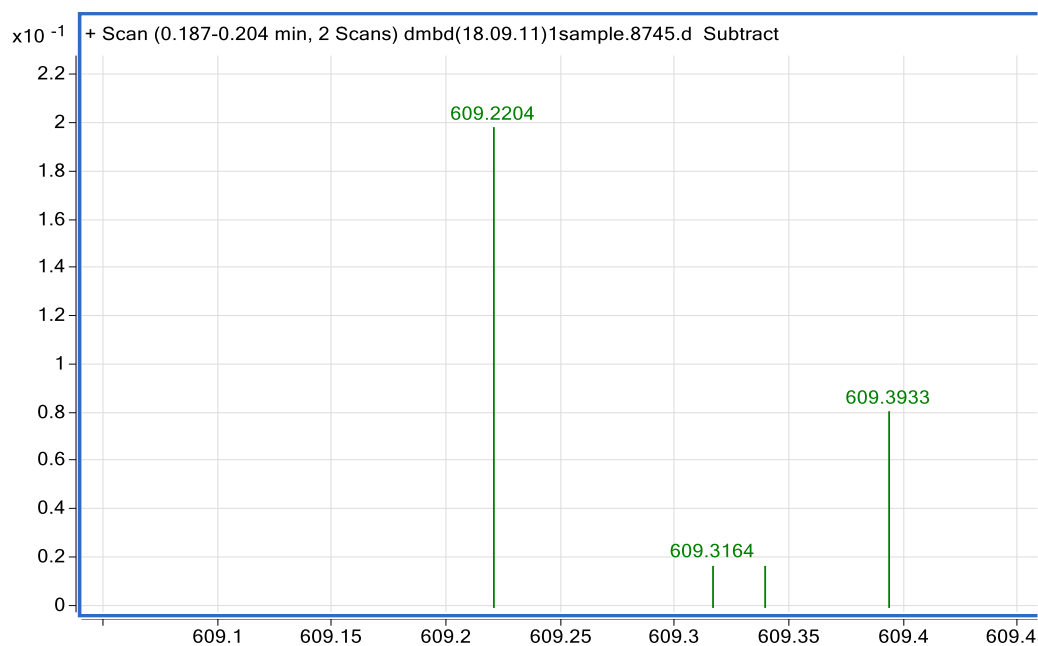

**Fig. S23.** HRMS of  $[1+H]^+$

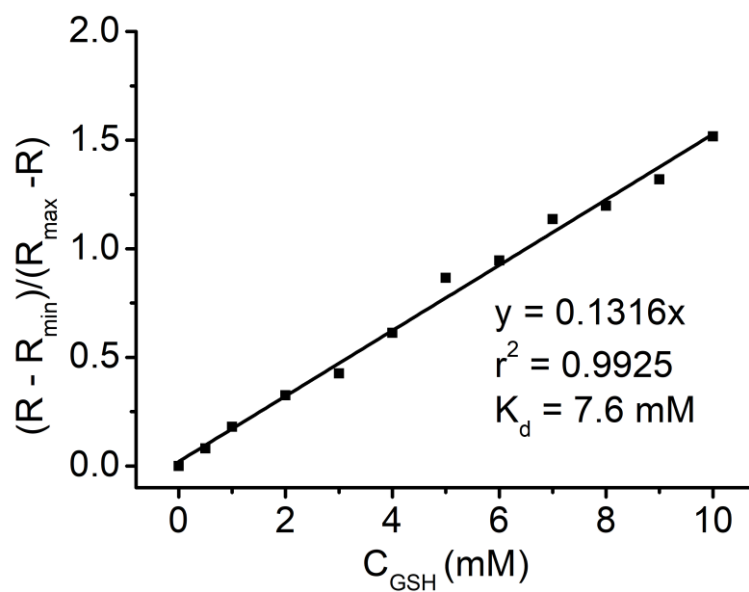

**Fig. S24.** Linear relationship between  $(R - R_{\min})/(R_{\max} - R)$  and GSH concentration.  $R$  is defined as the ratio of the fluorescence intensities between 1-GSH (544 nm) and the apparent fluorescence isosbestic point (603 nm),  $R_{\min}$  and  $R_{\max}$  correspond to the  $R$  values at zero and saturated GSH concentrations, respectively.
